# Supplementary material
Source: PubMed Central journal article supplement (PMC6402785)
Supplement: NIHMS1009397-supplement-Supplementary_Appendix.pdf [file NIHMS1009397-supplement-Supplementary_Appendix.pdf]

# THE LANCET

## Supplementary appendix

This appendix formed part of the original submission and has been peer reviewed.  
We post it as supplied by the authors.

Supplement to: Brilakis ES, Edson R, Bhatt DL, et al. Drug-eluting stents versus bare-metal stents in saphenous vein grafts: a double-blind, randomised trial. *Lancet* 2018; published online May 11. [http://dx.doi.org/10.1016/S0140-6736\(18\)30801-8](http://dx.doi.org/10.1016/S0140-6736(18)30801-8).

## Supplementary figures

**Figure S1.** Additional clinical outcomes at 12 months.

Cumulative incidence curves for patients who received drug-eluting stents and those who received bare metal stents for all-cause death (panel A), any myocardial infarction (panel B), target lesion revascularization (panel C), and definite or probable stent thrombosis (panel D).

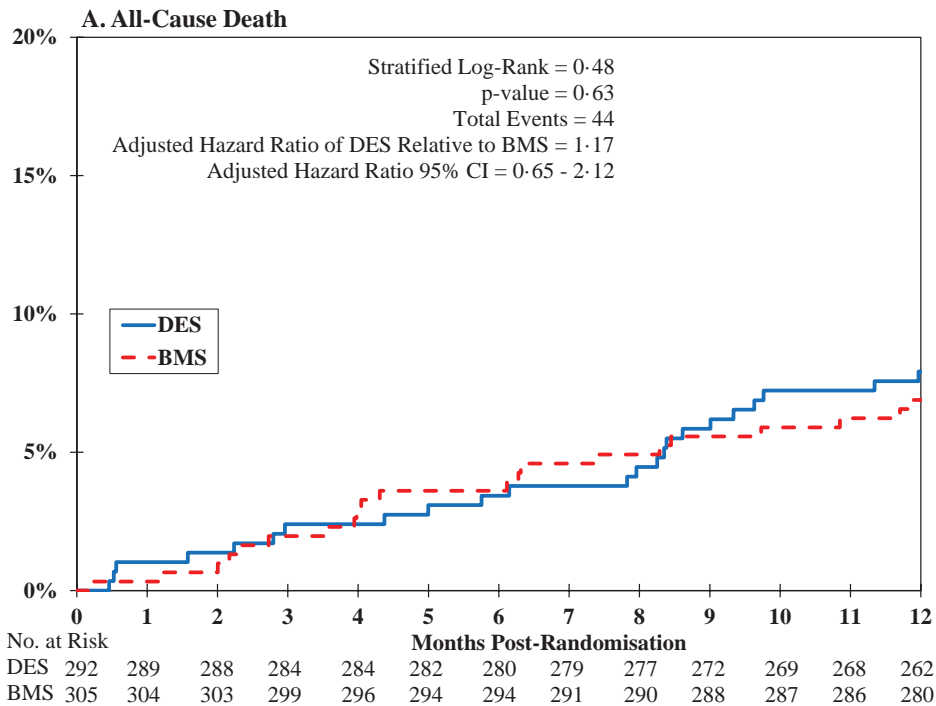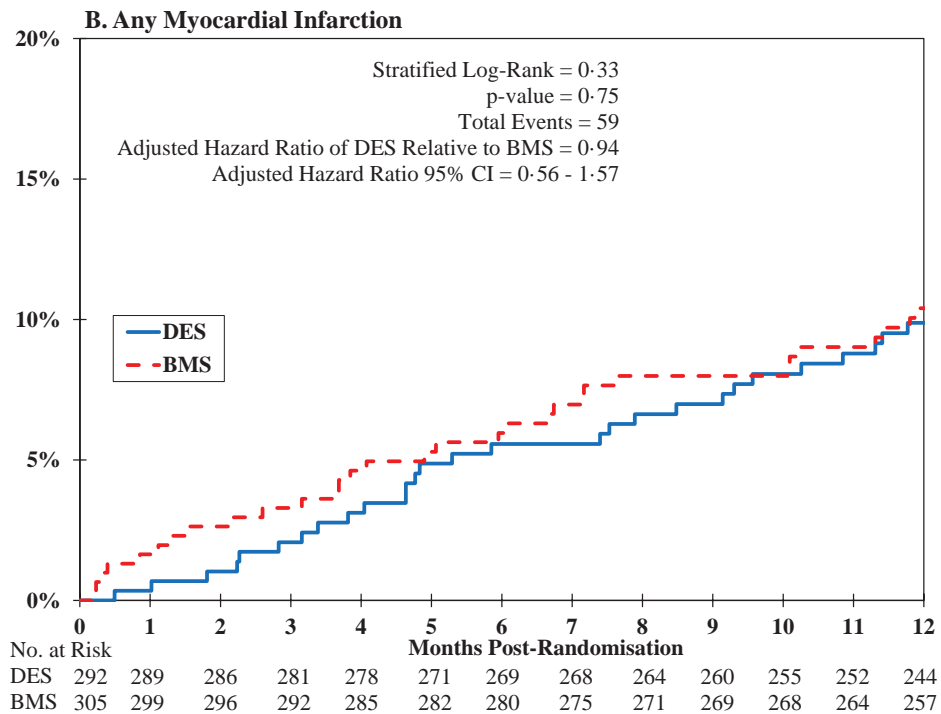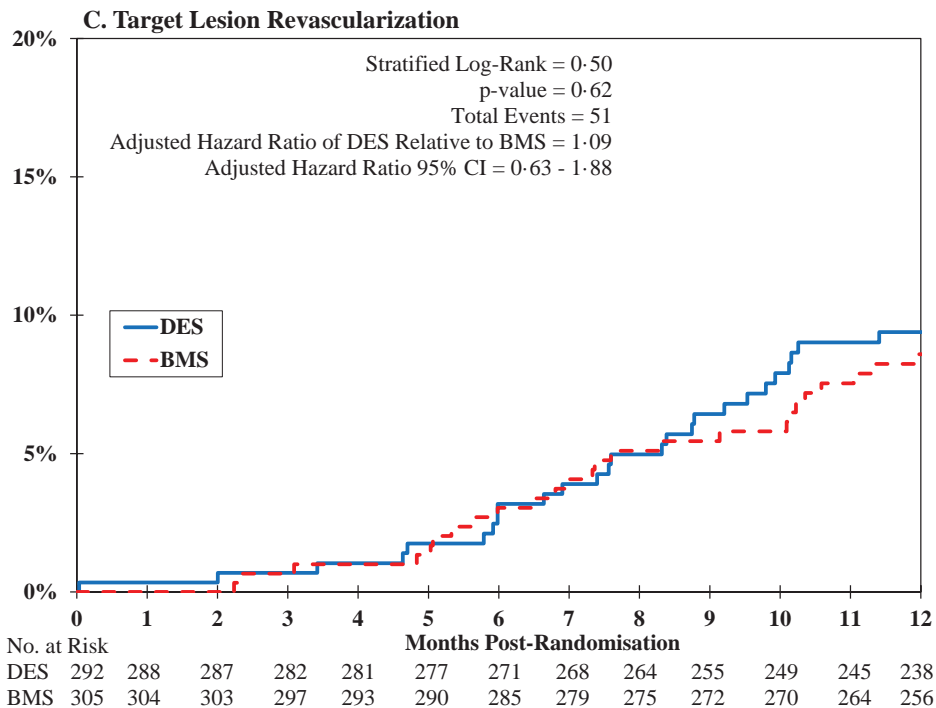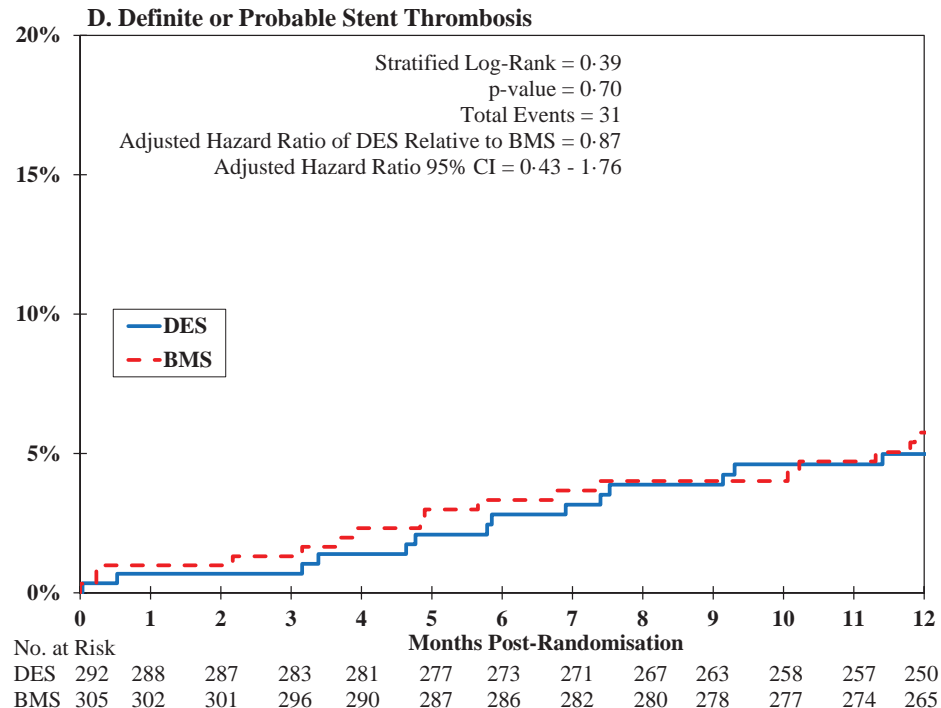

**Figure S2.** Clinical outcomes during the entire duration of follow-up.

Cumulative incidence curves for patients who received drug-eluting stents and those who received bare metal stents for target vessel failure (composite outcome of cardiac death, target vessel myocardial infarction, or target vessel revascularization, panel A), cardiac death (panel B), target vessel myocardial infarction (panel C), and target vessel revascularization (panel D).

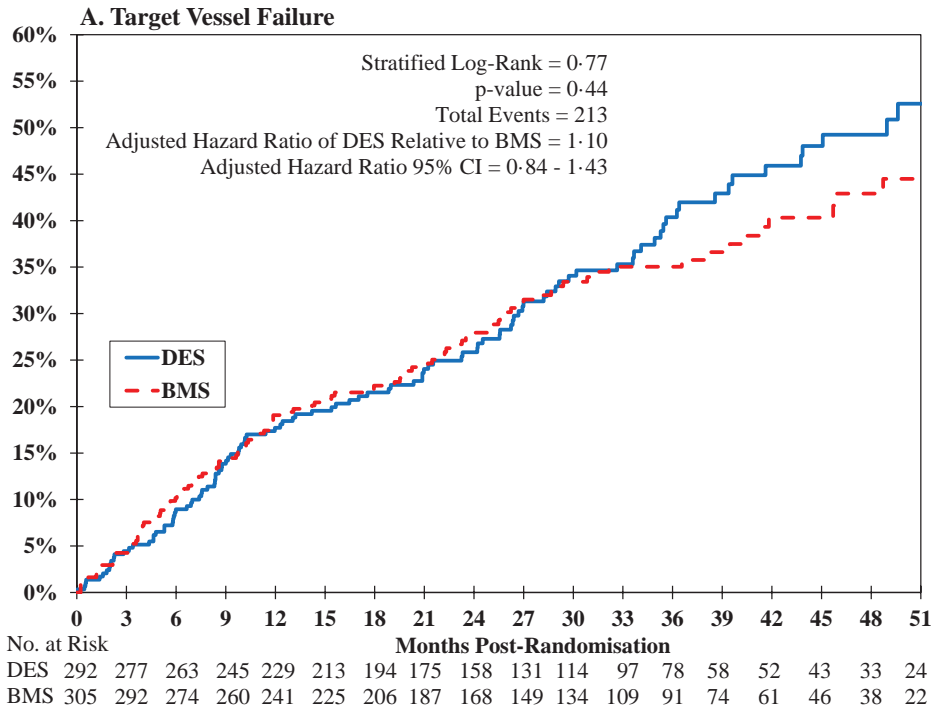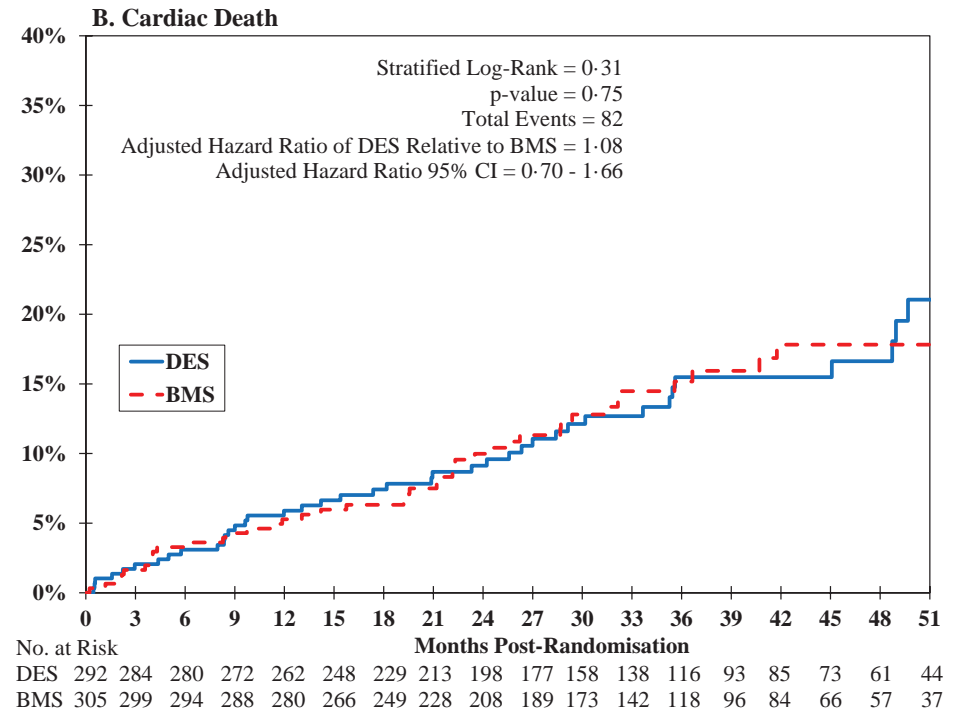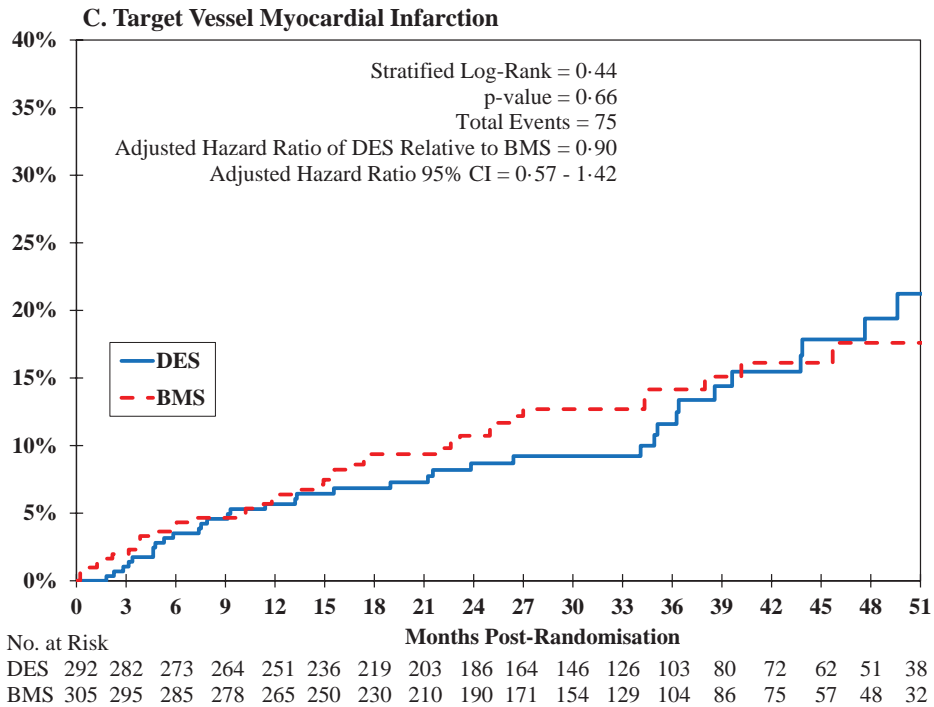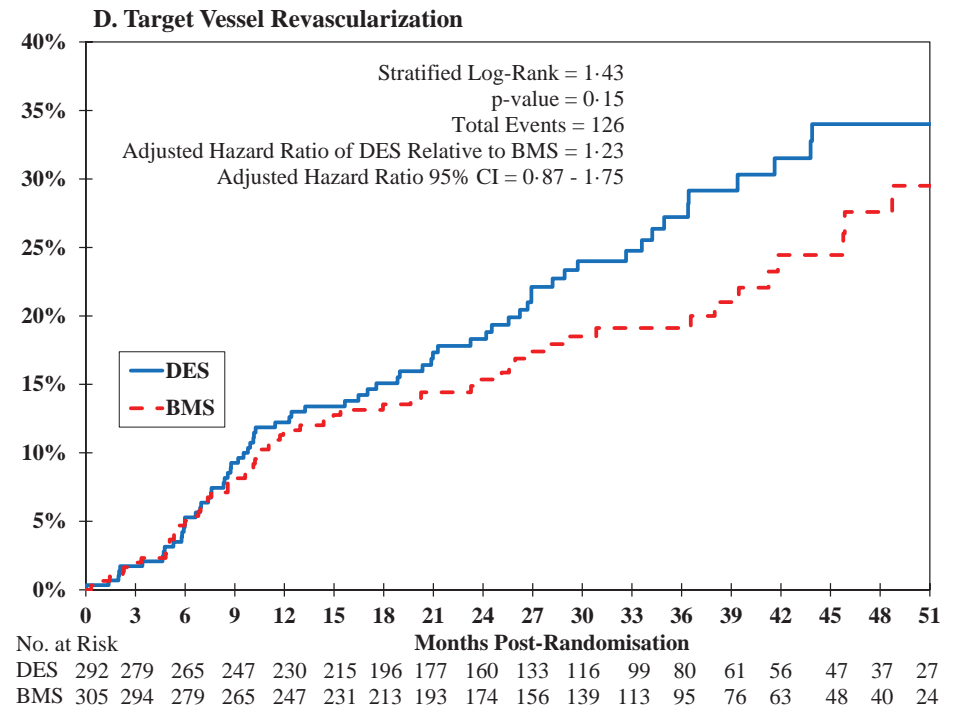

**Figure S3.** Additional clinical outcomes during the entire duration of follow-up.

Cumulative incidence curves for patients who received drug-eluting stents and those who received bare metal stents for all-cause death (panel A), any myocardial infarction (panel B), target lesion revascularization (panel C), and definite or probable stent thrombosis (panel D).

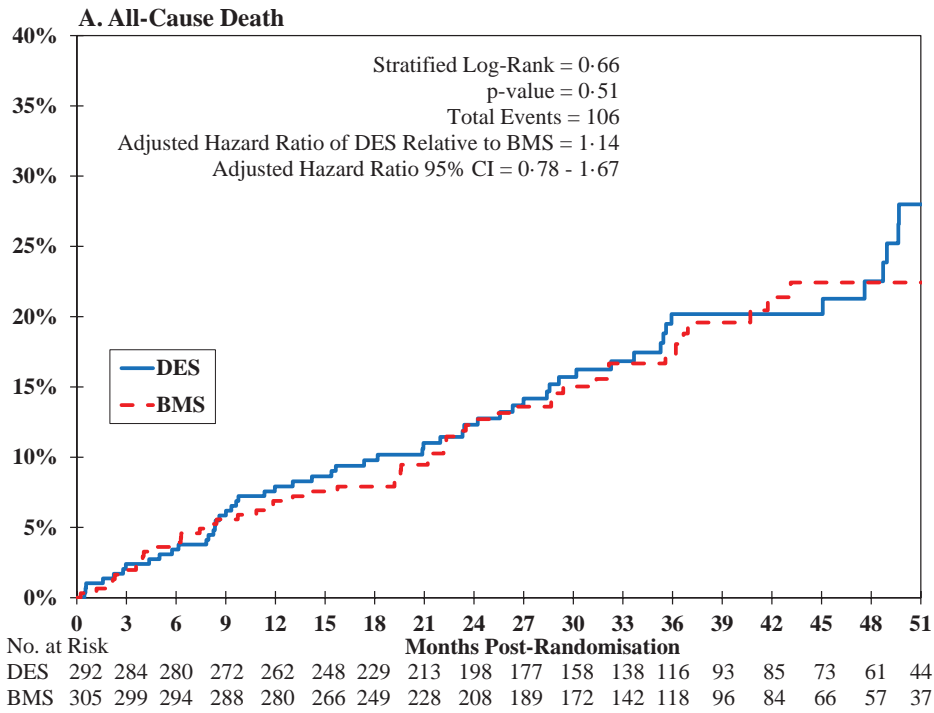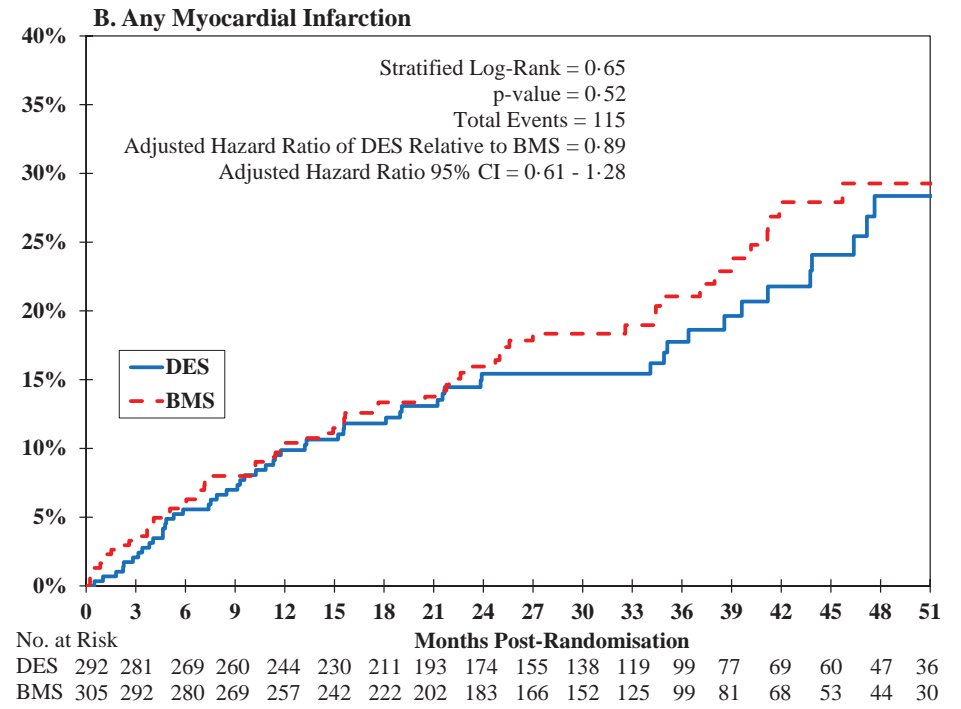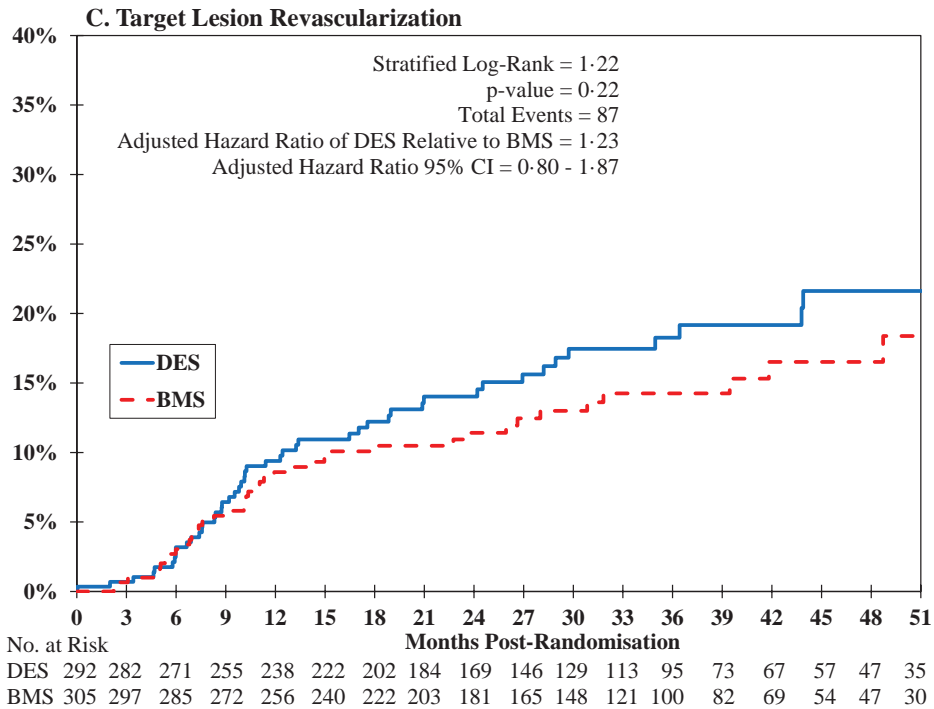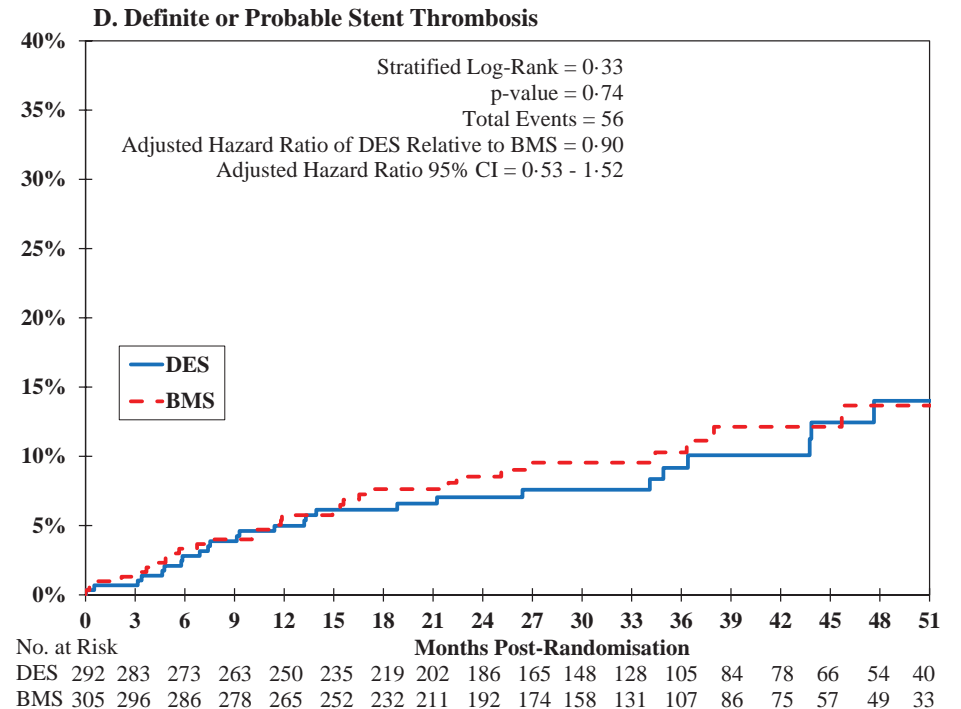

## Supplementary Tables

**Supplementary Table S1.** Types of stents used in study patients.

| Stent                                | DES<br>(n = 292) | BMS<br>(n = 305) |
|--------------------------------------|------------------|------------------|
| <b>Drug-eluting stent</b>            |                  |                  |
| Everolimus-eluting, n (%)            |                  |                  |
| Absorb, n (%)                        | 0 (0%)           | 0 (0%)           |
| Promus, n (%)                        | 66 (23%)         | 1 (0%)           |
| Synergy, n (%)                       | 0 (0%)           | 0 (0%)           |
| Xience, n (%)                        | 121 (41%)        | 4 (1%)           |
| Zotarolimus-eluting, n (%)           |                  |                  |
| Endeavor, n (%)                      | 14 (5%)          | 0 (0%)           |
| Resolute, n (%)                      | 77 (26%)         | 3 (1%)           |
| Sirolimus-eluting, n (%)             |                  |                  |
| Cypher, n (%)                        | 0 (0%)           | 0 (0%)           |
| Paclitaxel-eluting, n (%)            |                  |                  |
| Ion, n (%)                           | 5 (2%)           | 0 (0%)           |
| Taxus, n (%)                         | 2 (1%)           | 0 (0%)           |
| Name Unknown, n (%)                  | 1 (0%)           | 0 (0%)           |
| <b>Bare metal stent</b>              |                  |                  |
| Driver, n (%)                        | 0 (0%)           | 3 (1%)           |
| Integrity, n (%)                     | 1 (0%)           | 152 (50%)        |
| Multilink Vision, Ultra, or 8, n (%) | 0 (0%)           | 123 (40%)        |
| Rebel, n (%)                         | 1 (0%)           | 6 (2%)           |
| Veriflex (formerly Liberte), n (%)   | 0 (0%)           | 11 (4%)          |
| Type unknown, n (%)                  | 0 (0%)           | 7 (2%)           |



**Supplementary Table S2.** Target vessel failure by treatment group at 12 months and over the entire duration of follow-up for various subgroups.\*

| Length of Follow-up and Subgroup             | DES<br>(n = 292) | BMS<br>(n = 305) | Adjusted Hazard Ratio<br>(95% Confidence<br>Interval) | P-Value <sup>^</sup> | Log-Rank<br>Statistic | Number<br>of Events | Interaction<br>P-Value |
|----------------------------------------------|------------------|------------------|-------------------------------------------------------|----------------------|-----------------------|---------------------|------------------------|
| <b>12 MONTHS</b>                             |                  |                  |                                                       |                      |                       |                     |                        |
| Diabetes : No                                | 17/120 (14%)     | 22/119 (18%)     | 0.72 (0.38, 1.37)                                     | 0.36                 | 0.91                  | 39                  | 0.35                   |
| Yes                                          | 34/172 (20%)     | 36/186 (19%)     | 1.05 (0.66, 1.67)                                     | 0.85                 | 0.19                  | 70                  |                        |
| Number of target SVG lesions: 1              | 42/243 (17%)     | 45/259 (17%)     | 1.01 (0.67, 1.54)                                     | 0.96                 | 0.05                  | 87                  | 0.31                   |
| 2                                            | 9/49 (18%)       | 13/46 (28%)      | 0.61 (0.25, 1.48)                                     | 0.32                 | 0.99                  | 22                  |                        |
| Most recent graft age (years): <13.5         | 23/135 (17%)     | 28/164 (17%)     | 0.99 (0.57, 1.72)                                     | 0.97                 | 0.04                  | 51                  | 0.68                   |
| ≥13.5                                        | 28/156 (18%)     | 29/139 (21%)     | 0.85 (0.50, 1.43)                                     | 0.55                 | 0.60                  | 57                  |                        |
| Minimum stent diameter (mm): 2.25 to < 3.0   | 12/50 (24%)      | 10/63 (16%)      | 1.68 (0.72, 3.93)                                     | 0.21                 | 1.26                  | 22                  | 0.56                   |
| 3.0 to < 3.5                                 | 13/71 (18%)      | 17/65 (26%)      | 0.72 (0.35, 1.48)                                     | 0.58                 | 0.56                  | 30                  |                        |
| 3.5 to < 4.0                                 | 13/89 (15%)      | 17/92 (18%)      | 0.80 (0.39, 1.64)                                     | 0.56                 | 0.58                  | 30                  |                        |
| 4.0 or more                                  | 13/78 (17%)      | 13/83 (16%)      | 1.06 (0.49, 2.29)                                     | 0.88                 | 0.15                  | 26                  |                        |
| Total stent length (mm): <20                 | 21/137 (15%)     | 20/156 (13%)     | 1.23 (0.67, 2.27)                                     | 0.38                 | 0.87                  | 41                  | 0.26                   |
| ≥20                                          | 30/151 (20%)     | 37/147 (25%)     | 0.79 (0.49, 1.28)                                     | 0.37                 | 0.89                  | 67                  |                        |
| Recipient vessel: LAD                        | 17/60 (28%)      | 15/69 (22%)      | 1.42 (0.71, 2.85)                                     | 0.33                 | 0.98                  | 32                  | 0.47                   |
| Circumflex                                   | 19/112 (17%)     | 27/124 (22%)     | 0.78 (0.43, 1.41)                                     | 0.41                 | 0.83                  | 46                  |                        |
| RCA                                          | 15/117 (13%)     | 15/111 (14%)     | 0.87 (0.42, 1.81)                                     | 0.82                 | 0.22                  | 30                  |                        |
| Target lesion location: Aortic/Ostial        | 14/64 (22%)      | 20/81 (25%)      | 0.88 (0.44, 1.74)                                     | 0.74                 | 0.33                  | 34                  | 0.89                   |
| Body                                         | 34/195 (17%)     | 33/193 (17%)     | 0.99 (0.61, 1.60)                                     | 0.96                 | 0.05                  | 67                  |                        |
| Distal Anastomosis                           | 3/30 (10%)       | 4/30 (13%)       | 0.61 (0.13, 2.79)                                     | 0.59                 | 0.53                  | 7                   |                        |
| Baseline use of antiplatelet medications: No | 20/121 (17%)     | 27/137 (20%)     | 0.84 (0.47, 1.51)                                     | 0.62                 | 0.49                  | 47                  | 0.78                   |
| Yes                                          | 31/171 (18%)     | 31/168 (18%)     | 0.99 (0.60, 1.63)                                     | 0.98                 | 0.03                  | 62                  |                        |
| ACS status: No                               | 21/137 (15%)     | 25/136 (18%)     | 0.80 (0.45, 1.43)                                     | 0.56                 | 0.58                  | 46                  | 0.63                   |
| Yes                                          | 30/155 (19%)     | 33/169 (20%)     | 1.00 (0.61, 1.64)                                     | 0.99                 | 0.01                  | 63                  |                        |

| Length of Follow-up and Subgroup             | DES<br>(n = 292) | BMS<br>(n = 305) | Adjusted Hazard Ratio<br>(95% Confidence<br>Interval) | P-Value <sup>^</sup> | Log-Rank<br>Statistic | Number<br>of Events | Interaction<br>P-Value |
|----------------------------------------------|------------------|------------------|-------------------------------------------------------|----------------------|-----------------------|---------------------|------------------------|
| <b>ALL FOLLOW-UP</b>                         |                  |                  |                                                       |                      |                       |                     |                        |
| Diabetes : No                                | 43/120 (36%)     | 38/119 (32%)     | 1·13 (0·73, 1·77)                                     | 0·54                 | 0·62                  | 81                  | 0·99                   |
| Yes                                          | 65/172 (38%)     | 67/186 (36%)     | 1·09 (0·78, 1·54)                                     | 0·62                 | 0·50                  | 132                 |                        |
| Number of target SVG lesions: 1              | 89/243 (37%)     | 83/259 (32%)     | 1·20 (0·89, 1·62)                                     | 0·25                 | 1·15                  | 172                 | 0·19                   |
| 2                                            | 19/49 (39%)      | 22/46 (48%)      | 0·78 (0·41, 1·48)                                     | 0·53                 | 0·63                  | 41                  |                        |
| Most recent graft age (years): <13·5         | 51/135 (38%)     | 54/164 (33%)     | 1·21 (0·82, 1·77)                                     | 0·28                 | 1·08                  | 105                 | 0·40                   |
| ≥13·5                                        | 56/156 (36%)     | 49/139 (35%)     | 0·96 (0·65, 1·41)                                     | 0·82                 | 0·23                  | 105                 |                        |
| Minimum stent diameter (mm): 2·25 to < 3·0   | 21/50 (42%)      | 22/63 (35%)      | 1·37 (0·75, 2·50)                                     | 0·31                 | 1·01                  | 43                  | 0·71                   |
| 3·0 to < 3·5                                 | 24/71 (34%)      | 26/65 (40%)      | 0·87 (0·50, 1·51)                                     | 0·80                 | 0·25                  | 50                  |                        |
| 3·5 to < 4·0                                 | 33/89 (37%)      | 30/92 (33%)      | 1·14 (0·70, 1·87)                                     | 0·52                 | 0·65                  | 63                  |                        |
| 4·0 or more                                  | 29/78 (37%)      | 25/83 (30%)      | 1·23 (0·72, 2·11)                                     | 0·56                 | 0·59                  | 54                  |                        |
| Total stent length (mm): <20                 | 44/137 (32%)     | 42/156 (27%)     | 1·26 (0·83, 1·93)                                     | 0·18                 | 1·35                  | 86                  | 0·45                   |
| ≥20                                          | 63/151 (42%)     | 61/147 (41%)     | 1·03 (0·73, 1·47)                                     | 0·73                 | 0·34                  | 124                 |                        |
| Recipient vessel: LAD                        | 25/60 (42%)      | 22/69 (32%)      | 1·34 (0·75, 2·38)                                     | 0·38                 | 0·88                  | 47                  | 0·63                   |
| Circumflex                                   | 39/112 (35%)     | 48/124 (39%)     | 0·96 (0·63, 1·47)                                     | 0·97                 | 0·04                  | 87                  |                        |
| RCA                                          | 44/117 (38%)     | 34/111 (31%)     | 1·21 (0·76, 1·90)                                     | 0·36                 | 0·91                  | 78                  |                        |
| Target lesion location: Aortic/Ostial        | 22/64 (34%)      | 28/81 (35%)      | 0·95 (0·54, 1·68)                                     | 0·97                 | 0·04                  | 50                  | 0·51                   |
| Body                                         | 75/195 (38%)     | 70/193 (36%)     | 1·12 (0·81, 1·56)                                     | 0·37                 | 0·90                  | 145                 |                        |
| Distal Anastomosis                           | 11/30 (37%)      | 6/30 (20%)       | 1·73 (0·63, 4·71)                                     | 0·29                 | 1·05                  | 17                  |                        |
| Baseline use of antiplatelet medications: No | 38/121 (31%)     | 43/137 (31%)     | 0·99 (0·64, 1·54)                                     | 0·998                | 0·0022                | 81                  | 0·76                   |
| Yes                                          | 70/171 (41%)     | 62/168 (37%)     | 1·13 (0·80, 1·59)                                     | 0·53                 | 0·63                  | 132                 |                        |
| ACS status: No                               | 43/137 (31%)     | 44/136 (32%)     | 0·87 (0·57, 1·33)                                     | 0·63                 | 0·49                  | 87                  | 0·31                   |
| Yes                                          | 65/155 (42%)     | 61/169 (36%)     | 1·23 (0·87, 1·75)                                     | 0·26                 | 1·12                  | 126                 |                        |

\*All subgroup analyses except age of most recent SVG were prespecified in the protocol.

<sup>^</sup> P-value and adjusted hazard ratio statistics are from the stratified log-rank test which accounts for randomisation being stratified by both diabetes status and number of target SVG lesions for all subgroups except diabetes status (stratified only by number of target SVG lesions) and number of target SVG lesion (stratified only by diabetes status)

ACS, acute coronary syndrome; BMS, bare metal stent; DES, drug-eluting stent; LAD, left anterior descending artery; RCA, right coronary artery; SVG, saphenous vein graft

## CSP#571 DIVA Trial Investigators

| <b>Name</b>                    | <b>Site</b> |
|--------------------------------|-------------|
| Bina Ahmed, MD                 | Albuquerque |
| D. Michelle Ratliff, MD        | Albuquerque |
| Mark Ricciardi, MD             | Albuquerque |
| Mark Sheldon, MD               | Albuquerque |
| Milton Icenogle, MD            | Albuquerque |
| Richard Snider, MD             | Albuquerque |
| Amer Ardati, MD                | Ann Arbor   |
| Brahmajee Nallamothe, MD       | Ann Arbor   |
| Claire Duvernoy, MD            | Ann Arbor   |
| Daniel S. Menees, MD           | Ann Arbor   |
| Hitinder Gurm, MBBS            | Ann Arbor   |
| Michael P. Thomas, MD          | Ann Arbor   |
| Paul Grossman, MD              | Ann Arbor   |
| Kristine Owen, MD              | Asheville   |
| On Topaz, MD                   | Asheville   |
| Gautam Kumar, MD               | Atlanta     |
| Kreton Mavromatis, MD          | Atlanta     |
| Peter Block, MD                | Atlanta     |
| David A. Zidar, MD             | Cleveland   |
| Hiram Bezerra, MD              | Cleveland   |
| Jonathan Goldberg, MD          | Cleveland   |
| Jose Ortiz, MD                 | Cleveland   |
| Joseph Jozic, MD               | Cleveland   |
| Mohammed Osman, MD             | Cleveland   |
| Noah Rosenthal, MD             | Cleveland   |
| Sahil A. Parikh, MD            | Cleveland   |
| Tom A. Lassar, MD              | Cleveland   |
| Albert Chan, MD                | Columbia    |
| Arun Kumar, MD                 | Columbia    |
| Kul Aggarwal, MD               | Columbia    |
| Tillmann Cyrus, MD             | Columbia    |
| Emmanouil S. Brilakis, MD, PhD | Dallas      |
| Jerrold Grodin, MD             | Dallas      |
| Subhash Banerjee, MD           | Dallas      |
| Brack Hattler, MD              | Denver      |
| Ehrin Armstrong, MD            | Denver      |
| Ivan Casserly, MD              | Denver      |
| John Messenger, MD             | Denver      |
| Michael Kim, MD                | Denver      |
| R. Kevin Rogers, MD            | Denver      |

|                            |                 |
|----------------------------|-----------------|
| Stephen Waldo, MD          | Denver          |
| Thomas Tsai, MD            | Denver          |
| Kenneth Morris, MD         | Durham          |
| Mitchell Krucoff, MD       | Durham          |
| Sunil Rao, MD              | Durham          |
| Thomas J. Povsic, MD, PhD  | Durham          |
| William S. Jones, MD       | Durham          |
| Anthony Bavry, MD          | Gainesville     |
| Calvin Choi, MD            | Gainesville     |
| Ki Park, MD                | Gainesville     |
| Jayson Liu, MD             | Hines           |
| Biswajit Kar, MD           | Houston         |
| David Paniagua, MD         | Houston         |
| Hani Jneid, MD             | Houston         |
| Jeffrey Breall, MD, PhD    | Indianapolis    |
| Islam Bolad, MBBS, MD      | Indianapolis    |
| Rita Mukerji, MD           | Indianapolis    |
| Roopa Subbarao, MD, MBBS   | Indianapolis    |
| Ahmed Abdel-Latif, MD, PhD | Lexington       |
| David C. Booth, MD         | Lexington       |
| Khaled M. Ziada, MD        | Lexington       |
| Lawrence Rajan, MD         | Lexington       |
| Abdul Hakeem, MD           | Little Rock     |
| Barry F. Uretsky, MD       | Little Rock     |
| Mayank Agrawal, MD         | Little Rock     |
| Rajesh Sachdeva, MD        | Little Rock     |
| Zubair Ahmed, MD           | Little Rock     |
| Jesse McGee, MD            | Memphis         |
| Kodangudi Ramanathan, MD   | Memphis         |
| Rahman Shah, MD            | Memphis         |
| Alok Sharma, MD            | Minneapolis     |
| Edward McFalls, MD, PhD    | Minneapolis     |
| Rizwan Siddiqui, MD        | Minneapolis     |
| Santiago Garcia, MD        | Minneapolis     |
| Selcuk Adabag, MD, MS      | Minneapolis     |
| Stefan Bertog, MD          | Minneapolis     |
| Anand Irimpen, MD          | New Orleans     |
| Drew Baldwin, MD           | New Orleans     |
| Nidal Abi Rafeh, MD        | New Orleans     |
| Owen Mogabgab, MD          | New Orleans     |
| Patrice Delafontaine, MD   | New Orleans     |
| Jeffrey Lorin, MD          | New York Harbor |
| Steven Sedlis, MD          | New York Harbor |
| Eliot Schechter, MD        | Oklahoma City   |

|                                       |                 |
|---------------------------------------|-----------------|
| Faisal Latif, MD                      | Oklahoma City   |
| Mazen Abu-Fadel, MD                   | Oklahoma City   |
| Talla Rousan, MD                      | Oklahoma City   |
| Udho Thadani, MD, FACC, FAHA,<br>FCCS | Oklahoma City   |
| Fady Malik, MD, PhD                   | San Francisco   |
| Jeffrey Zimmet, MD, PhD               | San Francisco   |
| Kendrick Shunk, MD, PhD               | San Francisco   |
| Tony Chou, MD                         | San Francisco   |
| Alexis Beatty, MD, MAS                | Seattle         |
| Kenneth Lehmann, MD                   | Seattle         |
| Michael Stadius, MD                   | Seattle         |
| Andrew Klein, MD                      | St. Louis       |
| Caroline Rowe, FNP-BC                 | St. Louis       |
| Megumi Taniuchi, MD                   | St. Louis       |
| Andrew J. Klein, MD                   | St. Louis       |
| Michael Forsberg, MD                  | St. Louis       |
| Divya Kapoor, MD                      | Tucson          |
| Elizabeth Juneman, MD                 | Tucson          |
| Huu Tam Truong, MD                    | Tucson          |
| Kapildeo Lotun, MD                    | Tucson          |
| Ryan Tsuda, MD                        | Tucson          |
| Sergio Thai, MD                       | Tucson          |
| Steven Goldman, MD                    | Tucson          |
| Hoang Thai, MD                        | Tucson          |
| David Lu, MD                          | Washington D.C. |
| Vasilios Papademetriou, MD            | Washington D.C. |
| David Faxon, MD                       | West Roxbury    |
| Deepak L. Bhatt, MD, MPH              | West Roxbury    |
| Kevin Croce, MD, PhD                  | West Roxbury    |
| Sammy Elmariah, MD, MPH               | West Roxbury    |
| Scott Kinlay, MBBS, PhD               | West Roxbury    |
